# Supplementary material
Source: MDPI journal article supplement (https://www.mdpi.com/1996-1073/15/1/138)
Supplement: s1 [file s1]

# Economic feasibility of green hydrogen production by water electrolysis using wind and geothermal energy resources in Asal-Ghoubbet Rift (Republic of Djibouti): A comparative evaluation

Mohamed Osman Awaleh<sup>1\*</sup>, Abdi-Basid Adan<sup>1\*</sup>, Omar Assowe Dabar<sup>1\*</sup>, Mohamed Jalludin<sup>1</sup>, Moussa Mahdi Ahmed<sup>1</sup> and Ismael Abdillahi Guirreh<sup>2</sup>

<sup>1</sup>Institut des Sciences de la Terre. Centre d'Etudes et de Recherches de Djibouti (CERD), Route de l'aéroport, B.P. 486. Djibouti - ville, République de Djibouti ; [mohamed.jalludin@gmail.com](mailto:mohamed.jalludin@gmail.com) (M.J.) ; [moussa.mahdi@chemist.com](mailto:moussa.mahdi@chemist.com) (M.M.A)

<sup>2</sup>Université de Djibouti, Croisement RN2-RN5, B.P. 1904. Balbala, République de Djibouti ; [ismael.abdillahi@gmail.com](mailto:ismael.abdillahi@gmail.com) (I.A.G.)

\*Correspondence: [awaleh@gmail.com](mailto:awaleh@gmail.com); [Abdi-Basid@outlook.com](mailto:Abdi-Basid@outlook.com); [Assowe440@gmail.com](mailto:Assowe440@gmail.com)

## S1. Methodology

### S1.1. Weibull distribution

#### S1.1.1 Maximum likelihood method

This method determines the shape factor and scale factor after extensive iterations. The method of Maximum Likelihood is the most popular technique to perform the estimation of the Weibull parameters, especially for time series of wind data. In this method, the parameters  $k$  and  $c$  are computed using the equations below [1]:

$$k = \left[ \frac{\sum_{i=1}^n v_i^k \ln(v_i)}{\sum_{i=1}^n v_i^k} - \frac{\sum_{i=1}^n \ln(v_i)}{n} \right]^{-1} \quad (1)$$

$$c = \left[ \frac{1}{n} \sum_{i=1}^n v_i^k \right]^{\frac{1}{k}} \quad (2)$$

Where  $v_i$  is the wind speed in time  $i$  and  $n$  is the number of non-zero elements.

#### S1.1.2 W AsP method

The WAsP method has a requirement that the Weibull distribution should fit the measured wind speed data [2]. The WAsP method does not attempt to directly fit the measured frequency histogram, but has the two following requirements; (i) The mean power density of the fitted Weibull distribution must be equal to that of the observed distribution and, (ii) The frequencies of values above the mean observed wind speed must correspond to the fitted Weibull distribution as for the observed distribution [2].

$$c = \left( \frac{\sum_{i=1}^n v_i^3}{n\Gamma\left(\frac{3}{k} + 1\right)} \right)^{\frac{1}{3}} \quad (3)$$

In order to address the second aspect of this method, the shape factor  $k$  is computed from the Weibull cumulative distribution function  $F$  as [2]:

$$-\ln(1 - F(\bar{v})) = \left( \frac{\bar{v}}{c} \right)^k \quad (4)$$

### S1.1.3 Moment method

As the maximum likelihood method, the moment method estimates the shape ( $k$ ) and the scale ( $c$ ) parameters through an iterative resolution of Eq. (5) and Eq. (6) [3]:

$$\bar{v} = c \Gamma\left(1 + \frac{1}{k}\right) \quad (5)$$

$$\sigma_v = c \left[ \Gamma\left(1 + \frac{2}{k}\right) - \Gamma^2\left(1 + \frac{1}{k}\right) \right]^{\frac{1}{2}} \quad (6)$$

Where  $\Gamma$ ,  $\bar{v}$  and  $\sigma_v$  are respectively the gamma function, mean and standard deviation of the wind speed data. The Gamma function given by [3]:

$$\Gamma = \int_{t=0}^{t=\infty} t^{x-1} e^{-t} dt \quad (7)$$

### S1.1.4 Empirical method of Jestus

This method is proposed by Jestus et al. [4] to find the ( $k$ ) and ( $c$ ) parameters if the mean wind speed  $\bar{v}$  and standard deviation  $\sigma_v$  are available. This empirical method is a particular case of the moment method. The used empirical equations use the following equations to estimate  $k$  and  $c$  [5].

$$k = \left( \frac{\sigma_v}{\bar{v}} \right)^{-1.086} \quad 1 \leq k \leq 10 \quad (8)$$

$$c = \frac{\bar{v}}{\Gamma\left(1 + \frac{1}{k}\right)} \quad (9)$$

## S1.2 Performance analysis of Weibull fit methods

The accuracy of the four fitting methods for the estimation of Weibull parameters mentioned above was evaluated by the goodness of the fit statistics of coefficient of determination ( $R^2$ ); the root means square deviation (RMSE) and the mean absolute error (MAE). The first statistics test (i.e.,  $R^2$ ) studies the linear relationship between the observed wind data and the estimated with the Weibull function.  $R^2$  has a valued in the range 0 and 1. The Weibull fit model with the highest  $R^2$ , switch to the best estimated model of the measured wind speed data. Mathematically, the coefficient of determination is defined as follows [6]:

$$R^2 = \frac{\sum_{i=1}^n (y_i - z_i)^2 - \sum_{i=1}^n (y_i - x_i)^2}{\sum_{i=1}^n (y_i - z_i)^2} \quad (10)$$

The root mean square error (RMSE) assesses the accuracy of the fitting method used by comparing the difference between the distribution of the Weibull function and the observed wind data. The Weibull fit model with the smallest RMSE is more accurate and provide the best estimates of the parameters of the Weibull distribution function. The root mean square error can be calculated with the following expression [6]:

$$RMSE = \left[ \frac{1}{N} \sum_{i=1}^n (y_i - x_i)^2 \right]^{1/2} \quad (11)$$

The mean absolute error (MAE) is the average in absolute value of the discrepancy between the observations and the predicted from the Weibull density. MAE always has a positive value and indicates a higher accurate of the Weibull fit model, when its value is small. The mean absolute error can be calculated with the following expression [7]:

$$MAE = \frac{1}{N} \sum_{i=1}^n |y_i - x_i| \quad (12)$$

Where N is the number of observations,  $y_i$  is the frequency of the measured data,  $x_i$  is the Weibull distribution model,  $z_i$  is the average of the wind speeds from observation.

## S2. Geothermal resources assessment

### S2.1. USGS volumetric method

The volumetric method is one of the most widely used methods to quantify resource capacity in a geothermal reservoir [8]. The potential geothermal energy capacity in a reservoir (MWe) can be evaluated with the following mathematical expression [9]:

$$E_{GT} = E_R + E_W \quad (13)$$

$$E_R = A_r \cdot H_r \left( \rho_R \cdot C_R \times (1 - \phi) \times (T_i - T_f) \right) \quad (14)$$

$$E_W = A_r \cdot H_r \left( \rho_W \cdot C_W \times \phi (T_i - T_f) \right) \quad (15)$$

Where  $E_{GT}$  thermal energy in the reservoir in (MJ),  $L_t$  geothermal plant life.  $L_f$  is the load factor;  $R_f$  is the recovery factor and  $C_e$  is the conversion efficiency.  $\rho_R \cdot C_R$  are Specific heat and rock density in reservoir;  $\rho_W \cdot C_W$  are Specific heat and fluid density rock.  $\phi$  is the porosity.  $A_r$  is the area of reservoir and  $H_r$  is the thickness reservoir.  $T_i$  and  $T_{if}$  represent the reference temperature and cut off temperature, respectively.

Moreover, the volumetric method in combination with the Monte Carlo method is used to minimize the parameter uncertainty. Some of probability distributions of triangular; lognormal and uniform are required [10]. More runs of Simulation modeling allow accurate results. Three frequencies are used for stochastic evaluation of reservoir capacity: the case of 90% (i.e., proven capacity); 50% (proven and probable capacity) and 10% (proven, probable and possible capacity) [11]. Analyses of the Sensitivity of the input parameters quantify the variability of parameter uncertainties and assessment of the impact of each reservoir parameter on the estimation of geothermal reservoir capacity.

### S2.2. Thermodynamic assessment

The thermodynamic performances of single flash and dry steam are evaluated in terms of energy and exergy, according to the first and second laws of thermodynamics. Throughout this analysis in our study, the following assumptions are made accordingly:

(i) The system operates in a steady state [12]. (ii) Potential and kinetic energies are considered to be insignificant [13]. (iii) Ambient temperature and pressure are assumed to be 298.15 K and 1013 kPa [14]. When conserving mass and energy in an irreversible process, entropy is generated and exergy is destroyed. The mass, energy and exergy balances for any steady-state control volume with negligible changes in kinetic and potential energy are given with the following mathematical equations [15]:

$$\sum \dot{m}_i = \sum \dot{m}_e \quad (16)$$

$$\dot{Q} - \dot{W} = \sum \dot{m}_e h_e - \sum \dot{m}_i h_i \quad (17)$$

$$\dot{E}_Q - \dot{W} = \sum \dot{m}_e e_e - \sum \dot{m}_i e_i + \dot{E}_D \quad (18)$$

where  $\dot{Q}$  and  $\dot{W}$  are the net inputs of heat and work,  $\dot{m}$  is the mass flow rate of the fluid flow,  $h$  is the enthalpy,  $e$  is the specific flow rate of the exergy,  $\dot{E}_Q$  is the rate of exergy transfer through heat,  $\dot{E}_D$  is the rate of exergy destruction, and the indices  $i$  and  $e$  represent the input and output states. The specific flux exergy and the total exergy rate can be calculated as follows [15]:

$$e = (h - h_0) - T_0(s - s_0) \quad (19)$$

$$\dot{E} = \dot{m}(e) \quad (20)$$

Where  $s$  is entropy,  $T_0$  is the dead state temperature (25°C), and the subscripts 0 stands for the restricted dead state for geofluid.

The maximum specific work that can be achieved by a geothermal power plant using geothermal water at  $T_s$  in an environment at  $T_0$  can be calculated with the following expression:

$$W_{max} = (h_s - h_0) - T_0(S_s - S_0) \quad (21)$$

Where  $h_s$  and  $s_s$  are enthalpy and entropy of geothermal water, respectively.

The energy and exergy efficiencies are defined with the following mathematical equations:

$$\eta_{th} = \left( \frac{\text{energy in } kth \text{ component}}{\text{total energy input}} \right) \quad (22)$$

$$\eta_{th} = \left( \frac{\text{exergy in } kth \text{ component}}{\text{total energy input}} \right) \quad (23)$$

### S3. Production wind and geothermal decline

Ageing production capacity is an inevitable reality for all types of turbine. This is characterized by the reduction of the initial production performance. In this section, the declination rate of a wind turbine and a geothermal well are evaluated. Indeed, the load factor of a wind turbine, which decreases with age at an annual rate of  $1.6\% \pm 0.2\%$  [16, 17]. However, in the geothermal case, a typical harmonic decline rate of 5% can be considered per year for geothermal

well [15]. To calculate the annual potential of geothermal well in a given period and the annual rate of decline for the year  $k$ , the following expressions can be considered [18]:

$$W = \frac{W_i}{1 + D_{i,k}} \quad (24)$$

$$D = \frac{D_i}{1 + D_{i,t}} \quad (25)$$

In the previous equation,  $W_i$  is the initial production rate,  $W$  is the production rate at time  $t$  and  $D_i$  is the initial decline rate,  $W$  is the power produced by the well in year  $k$ . Additionally, an increase in installed capacity production leads to an increase in the reduction rate. This relationship can be evaluated with the following mathematical equation [18]:

$$D'_i = \left(\frac{W'_i}{W_i}\right) \times \left(\frac{\ln(W'_i)}{\ln(W_i)}\right) \times D_i \quad (26)$$

Here,  $D_i$  is the initial annual harmonic reduction rate of productivity when the total the production rate is  $W_i$  and  $D'_i$  are the initial annual rate of reduction of harmonics when the total production the rate is changed to  $W'_i$ . The number of years during which the installed installation can be maintained without any additional well drilling has been proposed by Ref. [18] as follows:

$$t_c = \frac{1}{D_i} \left[ \left( \frac{W_i N_{wi}}{(1 + r/100) \times P} \right) - 1 \right] \quad (27)$$

Where  $D_i$  is the initial annual harmonic decline rate,  $W_i$  is the initial productivity per well (MW),  $N_{wi}$  is the initial number of wells, (including at least one stand-by well),  $P$  is the plant capacity (MWe), and  $r$  is the minimum reserve production required capacity.

## S4. Green house assessment of wind and geothermal energies

### S4.1. Evaluation of CO<sub>2</sub> reduction from wind energy

In order to reduce the environment impact of the Carbone dioxide (CO<sub>2</sub>) emissions with the deployment of renewable energy, the electricity from wind and geothermal source are compared to the fossil fuel power plant performance. For this purpose, the IPCC recommended an emission factor from fossil fuel per KWh at 77 tons CO<sub>2</sub>/TJ (equivalent of 0.277 kCO<sub>2</sub>/kWh) [19]. The annual amount of CO<sub>2</sub> saved can be calculated as fellow [20].

$$CO_2 \text{ emission reduction} = E_{out}(kWh/year) \times 0.277 (kCO_2/kWh) \quad (28)$$

### S4.2. Exergoenvironmental of geothermal energy assessment

The potential decrease of greenhouse gas emissions with the geothermal energy is carrying out on the result of thermodynamics. Indeed, the exergo environmental impact factor represents how well a geothermal power station is harmful to the environment and the impact index factor and the improvement of this factor evaluate how much geothermal power plant damage the environmental. The exergoenvironmental analysis is evaluated with the following equations [21]:

$$f_{ex} = \frac{\dot{E}_{x_{D,Tot}}}{\dot{E}_{x_{in}}} \quad (29)$$

$$\theta_{ex} = \frac{100 \times f_{ex}}{\eta_{II}} \quad (30)$$

$$\theta_{ex'} = \frac{1}{\theta_{ex}} \quad (31)$$

Where  $f_{ex}$  is the impact factor;  $\dot{E}_{x_{D,Tot}}$  and  $\dot{E}_{x_{in}}$  represented the total exergy destruction and the exergy entering in KW of the geothermal power plant.  $\theta_{ex}$  is the impact index factor;  $\eta_{II}$  is the exergy efficiency of the power plant and  $\theta_{ex'}$  is the improvement of impact index factor.

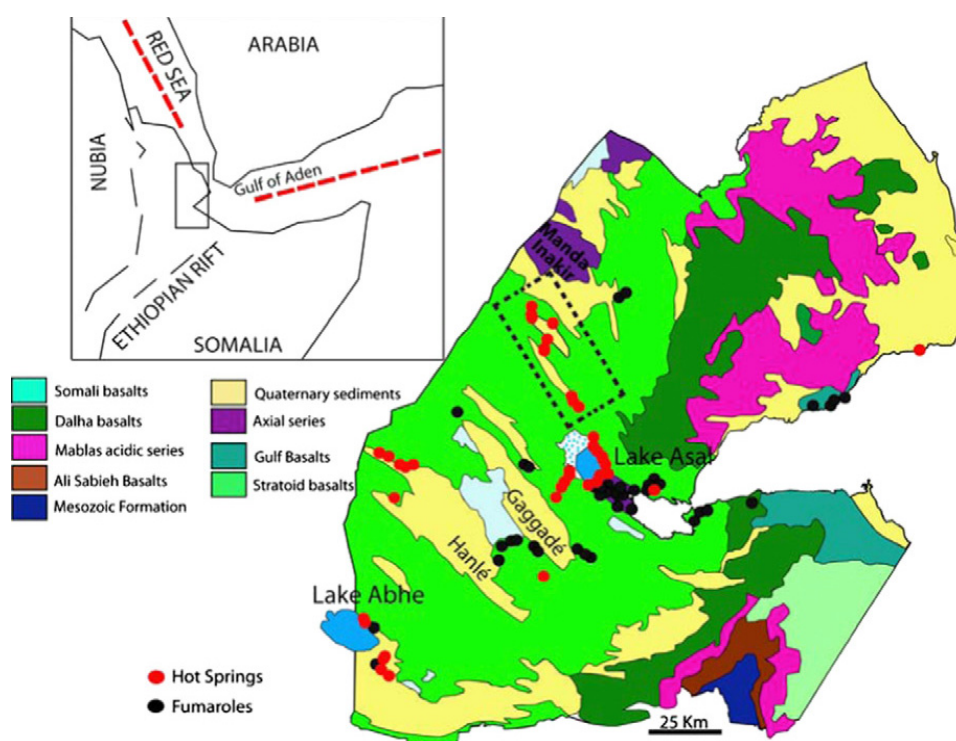

**Figure S1.** A schematic geological map of the Republic of Djibouti (SE Afar Rift) and hydrothermal activity of the Republic of Djibouti (Awaleh et al., 2017). In the inset: schematic map of the Afar Depression with the location of Djibouti (black rectangle) [22].

## S2. Results

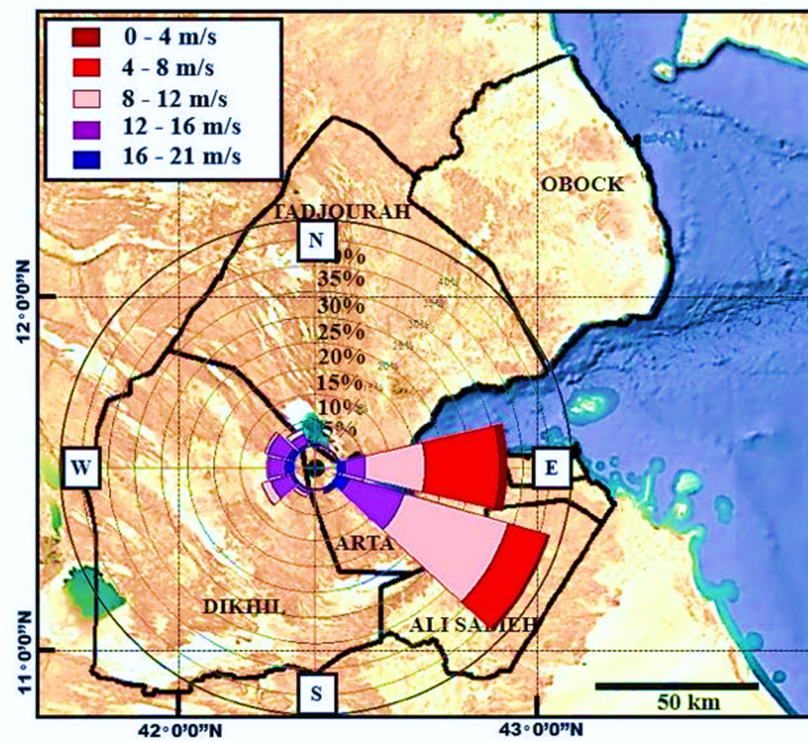

Figure S2. Annual wind direction for Ghoubbet at level of 60 m of year 2015



**Table S1.** Different size of water electrolysis model (0.4 to 800 Nm<sup>3</sup>/h [23]).

|                                                               | Designate<br>Electroyzer                                        | Rated<br>power<br>(KW) | Energy<br>required<br>(KWh/kg) | Efficiency of<br>Electrolyzer<br>(%) | Operation<br>time per day<br>(hr) | Efficiency of<br>rectifier<br>(%) | Lifespan<br>(yr)                       | References |
|---------------------------------------------------------------|-----------------------------------------------------------------|------------------------|--------------------------------|--------------------------------------|-----------------------------------|-----------------------------------|----------------------------------------|------------|
| <b>SMALL</b>                                                  | Electrolyser System Range of 0.4 to 20 Nm <sup>3</sup> /h [23]  |                        |                                |                                      |                                   |                                   |                                        |            |
| Polymer/Proton<br>Electrolyte Membrane<br>Electrolysis (PEME) | <b>PEMEs</b>                                                    | 7.2                    | 80.10                          | 41.61                                | 24                                | 90                                | 7 (Electrolyzer)<br>10 (Rectifier)     | [24]       |
| Alkaline Bipolar<br>Electrolysis<br>(AWE)                     | <b>AWEs</b>                                                     | 80                     | 55.6                           | 70.80                                | 24                                | 90                                | 7 (Electrolyzer)<br>10 (Rectifier)     | [24]       |
| <b>MEDUIM</b>                                                 | Electrolyser System Range of 20 to 100 Nm <sup>3</sup> /h [23]  |                        |                                |                                      |                                   |                                   |                                        |            |
| Polymer/Proton<br>Electrolyte Membrane<br>Electrolysis (PEME) | <b>PEME<sub>m</sub></b>                                         | 185                    | 54                             | 61.72                                | 24                                | 90                                | 20(Electrolyzer)<br>10 (Rectifier)     | [24]       |
| Alkaline Bipolar<br>Electrolysis<br>(AWE)                     | <b>AWE<sub>m</sub></b>                                          | 312                    | 57.9                           | 68.10                                | 24                                | 90                                | 15 (Electrolyzer)<br>10 (Rectifier)    | [26]       |
| <b>LARGE</b>                                                  | Electrolyser System Range of 100 to 800 Nm <sup>3</sup> /h [23] |                        |                                |                                      |                                   |                                   |                                        |            |
| Polymer/Proton<br>Electrolyte Membrane<br>Electrolysis (PEME) | <b>PEME<sub>l</sub></b>                                         | 1500                   | 83                             | 40.16                                | 24                                | 90                                | 15-20 (Electrolyzer)<br>10 (Rectifier) | [25]       |
| Alkaline Bipolar<br>Electrolysis<br>(AWE)                     | <b>AWE<sub>l</sub></b>                                          | 1000                   | 42                             | 79.36                                | 24                                | 90                                | 15 (Electrolyzer)<br>10 (Rectifier)    | [26]       |
| High-Temperature<br>electrolyzer unit (HTE)                   | --                                                              | --                     | 23.57                          | 94                                   | 24                                | 90                                | 10                                     | [27,28]    |



**Table S2.** Important parameters for the major stages of a single flash Power Plant (see figure 5).

| Sate | Pressure (kPa) | Temperature (°C) | Enthalpy (kJ/kg) | Entropy (kJ/kg K) | Mass flow (kg/s) | Energy (kW) | Energy (%) | Exergy (kW) | Exergy (%) |
|------|----------------|------------------|------------------|-------------------|------------------|-------------|------------|-------------|------------|
| 0    | 100            | 25               |                  |                   |                  |             |            |             |            |
| 1    | 9211.55        | 306              | 2739.36          | 5.67              | 40.00            | 109574.49   | 78.83      | 4315412.15  | 62.88      |
| 2    | 872.94         | 174              | 2752.18          | 6.63              | 40.00            | 110087.10   | 79.20      | 4324388.39  | 63.02      |
| 3    | 872.94         | 174              | 2752.18          | 6.63              | 12.51            | 34430.27    | 24.77      | 405991.71   | 5.92       |
| 4    | 14.55          | 53               | 2596.96          | 8.02              | 12.51            | 32488.50    | 23.37      | 376523.03   | 5.49       |
| 5    | 14.55          | 53               | 2596.96          | 8.02              | 12.51            | 32488.50    | 23.37      | 376523.03   | 5.49       |
| 6    | 872.94         | 174              | 2752.18          | 6.63              | 12.51            | 34430.27    | 24.77      | 405991.71   | 5.92       |
| 7    | 100            | 25               | 2546.50          | 8.56              | 12.51            | 31857.20    | 22.92      | 366611.62   | 5.34       |
| 8    | 100            | 35               | 2564.60          | 8.35              | 40.00            | 102584.00   | 73.80      | 4003777.90  | 58.34      |
| 9    | 17.74          | 55               | 2604.22          | 7.95              | 12.51            | 32579.28    | 23.44      | 377915.79   | 5.51       |
| 10   | 17.74          | 55               | 2604.22          | 7.95              | 12.51            | 32579.28    | 23.44      | 377915.79   | 5.51       |

**Table S3.** Important parameters for the major stages of a dry steam power plant (see figure 4)

| Sate | Pressure (kPa) | Temperature (°C) | Enthalpy (kJ/kg) | Entropy (kJ/kg K) | Mass flow (kg/s) | Energy (kW) | Energy (%) | Exergy (kW) | Exergy (%) |
|------|----------------|------------------|------------------|-------------------|------------------|-------------|------------|-------------|------------|
| 0    | 100            | 25               | 2546.50          | 8.56              |                  |             |            |             |            |
| 1    | 9211.55        | 306              | 2739.36          | 5.67              | 40               | 109574.49   | 78.83      | 4315412.15  | 62.88      |
| 2    | 14.55          | 53.22            | 2596.96          | 8.02              | 40               | 103878.50   | 74.74      | 4059492.41  | 59.16      |
| 3    | 14.55          | 53.22            | 2596.96          | 8.02              | 40               | 103878.50   | 74.74      | 4059492.41  | 59.16      |
| 4    | 100            | 25               | 2546.50          | 8.56              | 12.51            | 31857.20    | 22.92      | 366623.93   | 5.34       |
| 5    | 100            | 35               | 2564.60          | 8.35              | 40               | 102584.00   | 73.80      | 4003757.63  | 58.34      |

**Table S4.** Statistics summary of wind speed at level of 80 m of Ghoubbet.

| Statistics parameters at level of 80 m | Values  |
|----------------------------------------|---------|
| Mean wind speed (m/s)                  | 10.00   |
| Standard Deviation                     | 4.02    |
| Minimum Wind speed (m/s)               | 0.42    |
| Maximum wind speed (ms/)               | 21.108  |
| Power density (W/m <sup>2</sup> )      | 904.455 |
| Wind shear (60-80m)                    | 0.2048  |
| Skewness coefficient                   | -0.140  |
| Kurtosis coefficient                   | -0.633  |

**Table S5.** Characteristics of the different wind turbine models considered in this study and the calculated Annual energy production and the capacity factor [29].

| WIND TURBINE        | Designate Turbine | Rated Power (kW) | Cut-in speed (m/s) | Rated speed (m/s) | Cut-out speed (m/s) | Hub Height (m)  | Lifetime (yr) | Cf (%)         | Eout (MWh/yr)   |
|---------------------|-------------------|------------------|--------------------|-------------------|---------------------|-----------------|---------------|----------------|-----------------|
| Neg Micon NM60/1000 | T1                | 1000             | 3                  | 16                | 20                  | 70/80           | 20            | 0.342841       | 3003.28         |
| ELKRAFT Avedøre 1MW | T2                | 1000             | 4                  | 15                | 25                  | 55              | 20            | 0.39241        | 3437.55         |
| Suzlon S.64-1000    | T3                | 1000             | 3                  | 11                | 25                  | 65              | 20            | 0.63692        | 5579.46         |
| Goldwind GW 62/1200 | T4                | 1200             | 3                  | 12.5              | 25                  | 69/85           | 20            | 0.54400        | 5718.50         |
| DeWind D6 64/1250   | T5                | 1250             | 2.5                | 12.3              | 25                  | 68/91.5         | 20            | 0.56001        | 6132.12         |
| Suzlon S.66-1250    | T6                | 1250             | 4                  | 12                | 20                  | 74.5            | 20            | 0.55427        | 6069.26         |
| Goldwind GW 87/1500 | T7                | 1500             | 3                  | 9.9               | 22                  | 75/85           | 20            | 0.70216        | 9226.37         |
| GE 1.5sle           | T8                | 1500             | 3.5                | 12                | 25                  | 61.4/64.7/80/85 | 20            | 0.56973        | 7486.22         |
| GE 1.6-82.5         | T9                | 1600             | 3.5                | 10                | 25                  | 65/80/100       | 20            | 0.69259        | 9707.33         |
| ECO 80/1670         | T10               | 1670             | 3                  | 25                | 34                  | 60/70/80        | 20            | 0.11466        | 1677.45         |
| Vestas V82-1.65     | T11               | 1650             | 2.5                | 13                | 32                  | 59-108          | 20            | 0.51750        | 7479.94         |
| Gamesa G66          | T12               | 1650             | 4                  | 15                | 25                  | 60/78           | 20            | 0.39241        | 5671.96         |
| Envision EN106-1.8  | T13               | 1800             | 3                  | 9.5               | 20                  | 80/90/100       | 20            | 0.71899        | 11337.07        |
| Vestas V100-1.8     | T14               | 1800             | 3                  | 12                | 20                  | 80/95/120       | 20            | 0.56563        | 8918.84         |
| GE 1.85 - 82.5      | T15               | 1850             | 3                  | 13                | 25                  | 65/80/100       | 20            | 0.51374        | 8325.62         |
| GE 1.85 - 87        | T16               | 1850             | 3                  | 12.5              | 25                  | 80              | 20            | 0.54400        | 8 816.02        |
| Gamesa G80          | T17               | 2000             | 3.5                | 12                | 25                  | 60/67/78/100    | 20            | 0.56973        | 9981.62         |
| Vestas V110         | T18               | 2000             | 3                  | 11.5              | 20                  | 80/95/125       | 20            | 0.59668        | 10453.87        |
| Gamesa G114-2.1MW   | T19               | 2100             | 1                  | 11.5              | 25                  | 80/93/106/125   | 20            | 0.61563        | 11325.04        |
| Avantis AV 1010     | T20               | 2300             | 3                  | 11.2              | 25                  | 99              | 20            | 0.62449        | 12582.22        |
| Senvion 2.3M120     | T21               | 2330             | 3                  | 12                | 20                  | 90/120          | 20            | 0.56563        | 11544.94        |
| Yinhe GX103-2.5MW   | T22               | 2500             | 3                  | 7.5               | 25                  | 80              | 20            | 0.83575        | 18302.85        |
| Kenersys K100 2.5MW | T23               | 2500             | 3                  | 14                | 25                  | 85/100/135      | 20            | 0.45549        | 9975.21         |
| Yinhe GX93-2.5MW    | T24               | 2500             | 3                  | 8,5               | 25                  | 80              | 20            | 0.78469        | 17184.61        |
| Yinhe GX113-2.5MW   | T25               | 2500             | 3                  | 7                 | 20                  | 88.3            | 20            | <b>0.84962</b> | <b>18606.64</b> |

|                                   |     |      |     |      |    |                                |    |         |          |
|-----------------------------------|-----|------|-----|------|----|--------------------------------|----|---------|----------|
| <b>Gamesa G114-2.625MW</b>        | T26 | 2630 | 2   | 11   | 25 | 68/80/93/125                   | 20 | 0.64400 | 14837.00 |
| <b>Alstom ECO 122/2700</b>        | T27 | 2700 | 3   | 10   | 34 | 89                             | 20 | 0.69853 | 16521.71 |
| <b>Dongfang G3000-119</b>         | T28 | 3000 | 3   | 10.5 | 20 | 90 / site-specific             | 20 | 0.65871 | 17310.98 |
| <b>Enercon E-101</b>              | T29 | 3050 | 2   | 13   | 25 | 99/124/135/149                 | 20 | 0.51986 | 13889.53 |
| <b>E-101 E2 3.050</b>             | T30 | 3050 | 2   | 13   | 34 | 74                             | 20 | 0.52006 | 13894.97 |
| <b>General Electric GE 3.2s</b>   | T31 | 3200 | 3   | 14.3 | 25 | 100 - 140                      | 20 | 0.43876 | 12299.24 |
| <b>General Electric GE3.2-130</b> | T32 | 3200 | 2   | 12   | 25 | 85/110/134/155                 | 20 | 0.58137 | 16296.83 |
| <b>Gamesa G132-3.3MW</b>          | T33 | 3300 | 2   | 10   | 25 | 84/97/114/134/site-specific    | 20 | 0.70586 | 20404.87 |
| <b>Goldwind GW 140/3400</b>       | T34 | 3400 | 2.5 | 10.1 | 20 | 100 / 110 / 120                | 20 | 0.68750 | 20476.47 |
| <b>Gamesa G132-3.465MW</b>        | T35 | 3470 | 3   | 11   | 25 | 84/97/114/134                  | 20 | 0.63692 | 19360.73 |
| <b>Enercon E-101 E2 3.500</b>     | T36 | 3500 | 2   | 15   | 25 | 74                             | 20 | 0.40645 | 12461.79 |
| <b>Goldwind GW 136/4200</b>       | T37 | 4200 | 2.5 | 11.2 | 25 | 100 / 110 / site-specific      | 20 | 0.62855 | 23125.65 |
| <b>Senvion 4.2M118</b>            | T38 | 4200 | 3   | 12.5 | 22 | Site-specific                  | 20 | 0.54180 | 19934.08 |
| <b>SWT DD /4300</b>               | T39 | 4300 | 3   | 15   | 25 | 115/135 m and site-specific    | 20 | 0.40129 | 15115.70 |
| <b>Goldwind GW 155/4500</b>       | T40 | 4500 | 2.5 | 10.8 | 26 | 95 / 110 / 140 / site-specific | 20 | 0.65362 | 25765.82 |
| <b>ADWEN AD5-116</b>              | T41 | 5000 | 4   | 12.5 | 25 | Site-specific                  | 20 | 0.53306 | 23347.83 |
| <b>Sinovel SL5000/155</b>         | T42 | 5000 | 3.5 | 10   | 25 | 110                            | 20 | 0.69259 | 30335.40 |

**Table S6.** Cost prospect of the wind-powered hydrogen production system in Ghoubbet without and with degradation rate.

| years        | Capital investment (CI) in \$ | Annual operation and Maintenance cost (COM) in \$ | Present Value Cost (PVC) in \$ | Energy production (EWT) in kWh/yr | Energy production with degradation (EWT) in kWh/yr |
|--------------|-------------------------------|---------------------------------------------------|--------------------------------|-----------------------------------|----------------------------------------------------|
| 0            | 5200000                       | 0                                                 | 5200000                        | 0                                 | 0                                                  |
| 1            | 0                             | 316586,9938                                       | 316586.99                      | 18606641.39                       | 18606641.39                                        |
| 2            | 0                             | 321241,4251                                       | 321241.43                      | 18606641.39                       | 18308935.13                                        |
| 3            | 0                             | 325964,2854                                       | 325964.29                      | 18606641.39                       | 18015992.17                                        |
| 4            | 0                             | 330756,5808                                       | 330756.58                      | 18606641.39                       | 17727736.29                                        |
| 5            | 0                             | 335619,332                                        | 335619.33                      | 18606641.39                       | 17444092.51                                        |
| 6            | 0                             | 340553,5749                                       | 340553.57                      | 18606641.39                       | 17164987.03                                        |
| 7            | 0                             | 345560,3605                                       | 345560.36                      | 18606641.39                       | 16890347.24                                        |
| 8            | 0                             | 350640,7555                                       | 350640.76                      | 18606641.39                       | 16620101.68                                        |
| 9            | 0                             | 355795,8419                                       | 355795.84                      | 18606641.39                       | 16354180.05                                        |
| 10           | 0                             | 361026,7179                                       | 361026.72                      | 18606641.39                       | 16092513.17                                        |
| 11           | 0                             | 366334,4977                                       | 366334.50                      | 18606641.39                       | 15835032.96                                        |
| 12           | 0                             | 371720,312                                        | 371720.31                      | 18606641.39                       | 15581672.44                                        |
| 13           | 0                             | 377185,3081                                       | 377185.31                      | 18606641.39                       | 15332365.68                                        |
| 14           | 0                             | 382730,6499                                       | 382730.65                      | 18606641.39                       | 15087047.83                                        |
| 15           | 0                             | 388357,5189                                       | 388357.52                      | 18606641.39                       | 14845655.06                                        |
| 16           | 0                             | 394067,1135                                       | 394067.11                      | 18606641.39                       | 14608124.58                                        |
| 17           | 0                             | 399860,65                                         | 399860.65                      | 18606641.39                       | 14374394.59                                        |
| 18           | 0                             | 405739,3626                                       | 405739.36                      | 18606641.39                       | 14144404.27                                        |
| 19           | 0                             | 411704,5034                                       | 411704.50                      | 18606641.39                       | 13918093.80                                        |
| 20           | 0                             | 417757,3431                                       | 417757.34                      | 18606641.39                       | 13695404.30                                        |
| <b>Total</b> | <b>5200000</b>                | <b>7299203,127</b>                                | <b>12499203.13</b>             | <b>372132827.79</b>               | <b>320647722.2</b>                                 |

**Table S7.** Electrolyzer performance analysis using wind energy [24–26, 29].

| Designate Electrolyzer Model <sup>1,2</sup> | Rated power (KW) | Amount of H <sub>2</sub> (ton/yr) | Fresh water required (m <sup>3</sup> /yr) | Efficiency System (%) | Number of electrolyzer required | LCOH (\$/kg) |
|---------------------------------------------|------------------|-----------------------------------|-------------------------------------------|-----------------------|---------------------------------|--------------|
| PEME <sub>s</sub>                           | 7.2              | 209.1                             | 2326                                      | 10.38                 | 315                             | 7.187        |
| AWE <sub>s</sub>                            | 80               | 301.1                             | 3349.4                                    | 14.95                 | 25                              | 2.655        |
| PEME <sub>m</sub>                           | 185              | 310.1                             | 3450.3                                    | 15.40                 | 13                              | 0.680        |
| AWE <sub>m</sub>                            | 312              | 289.5                             | 3220.6                                    | 14.38                 | 7                               | 1.348        |
| PEME <sub>i</sub>                           | 1500             | 201.8                             | 2244.8                                    | 10.02                 | 2                               | 5.272        |
| AWE <sub>i</sub>                            | 1000             | 398.7                             | 4436.1                                    | 19.80                 | 3                               | 1.063        |

<sup>1</sup>PEME<sub>i</sub>/AWE<sub>i</sub> (i.e : s for small size; m for medium; and l for large size) <sup>2</sup>Rectifier efficiency at 90%

The investment cost of the electrolyzer takes into account the capital cost, the annual operation and maintenance expenses, the replacement cost, the annual electricity consumption cost and the investment in raw material (desalinated water).

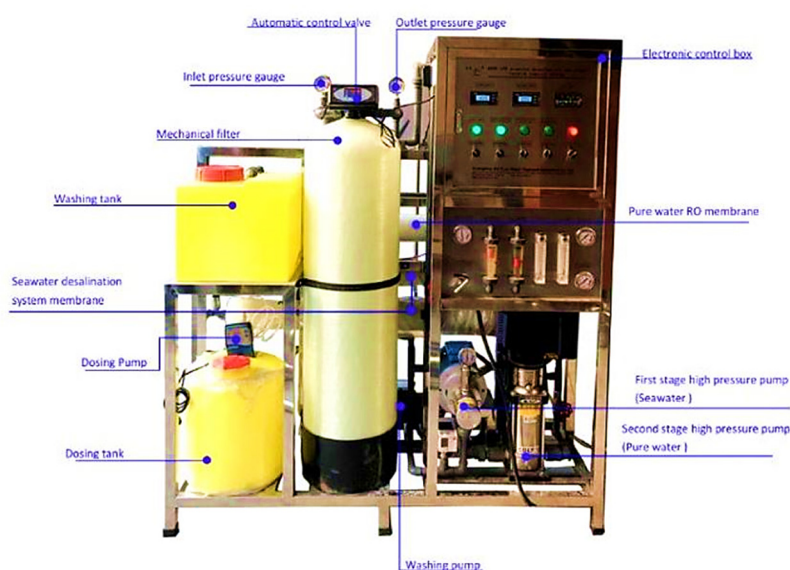**Figure S3.** Different equipment of RO, Guangzhou Kai Yuan Water Treatment Equipment Co. Ltd [30].

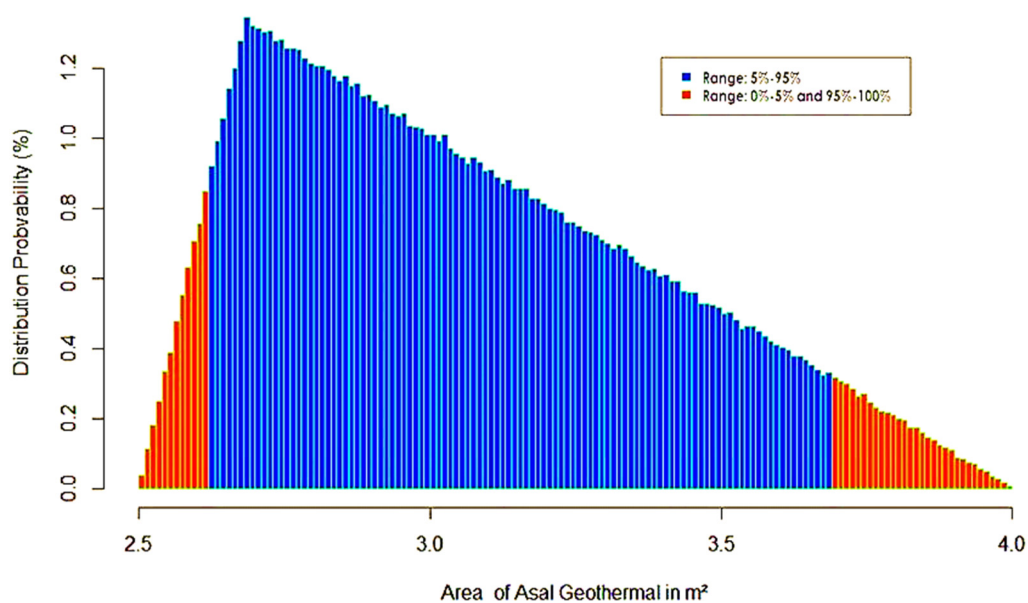

**Figure S4.** Probability distribution of Monte Carlo simulation of Area of Asal-Ghoubbet Rift in m².

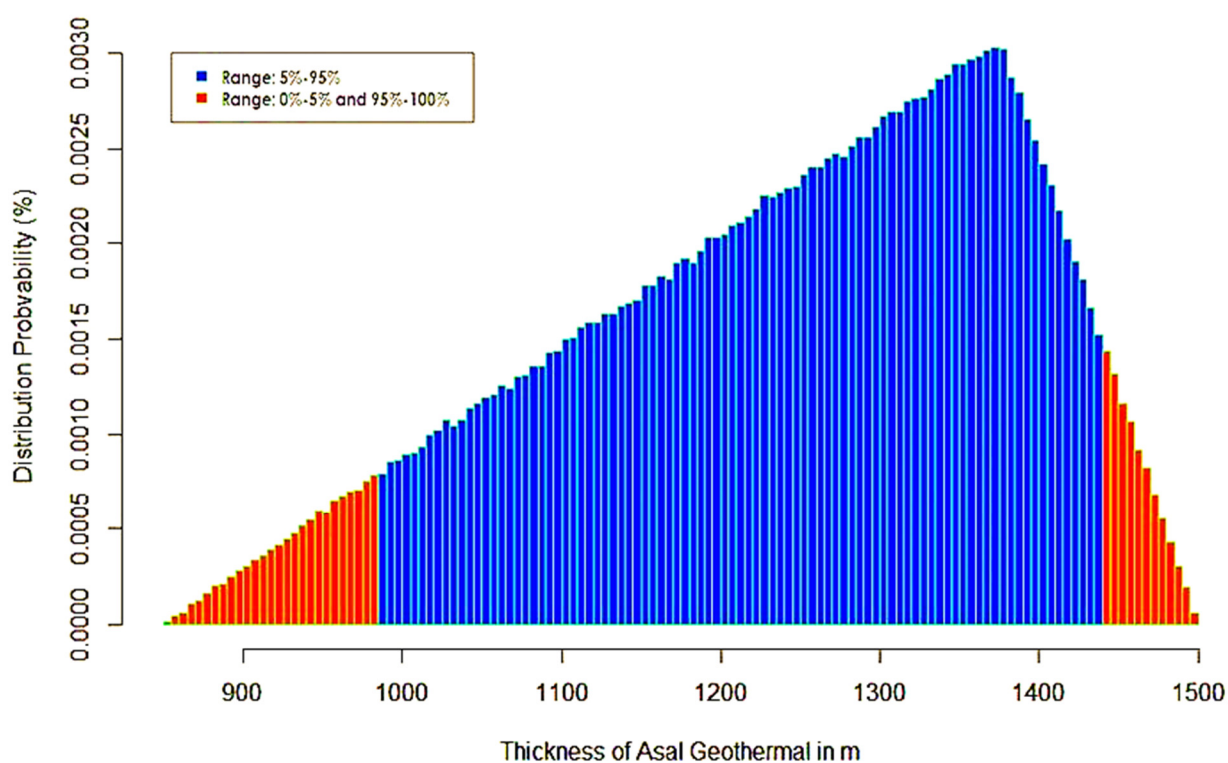

**Figure S5.** Probability distribution of Monte Carlo simulation of Thickness of Asal-Ghoubbet Rift.

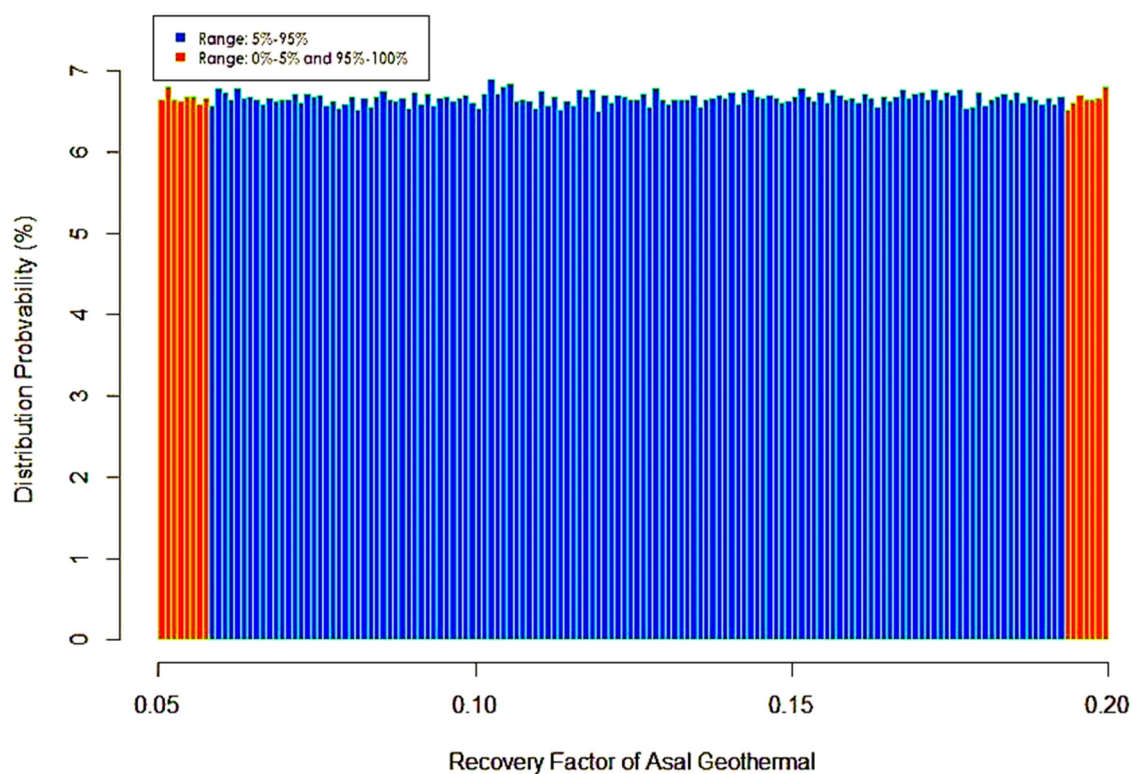

**Figure S6.** Probability distribution of Monte Carlo simulation of Recovery Factor of Asal-Ghoubbet Rift.

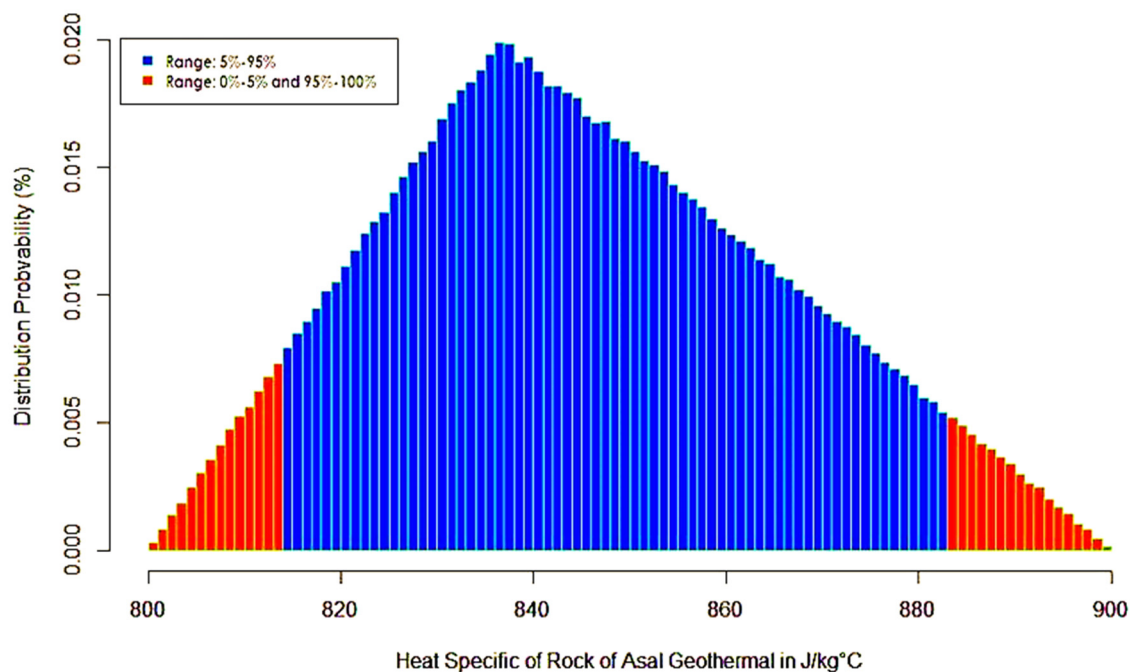

**Figure S7.** Probability distribution of Monte Carlo simulation of Heat Specific of Rock of Asal-Ghoubbet Rift in J/kg°C.



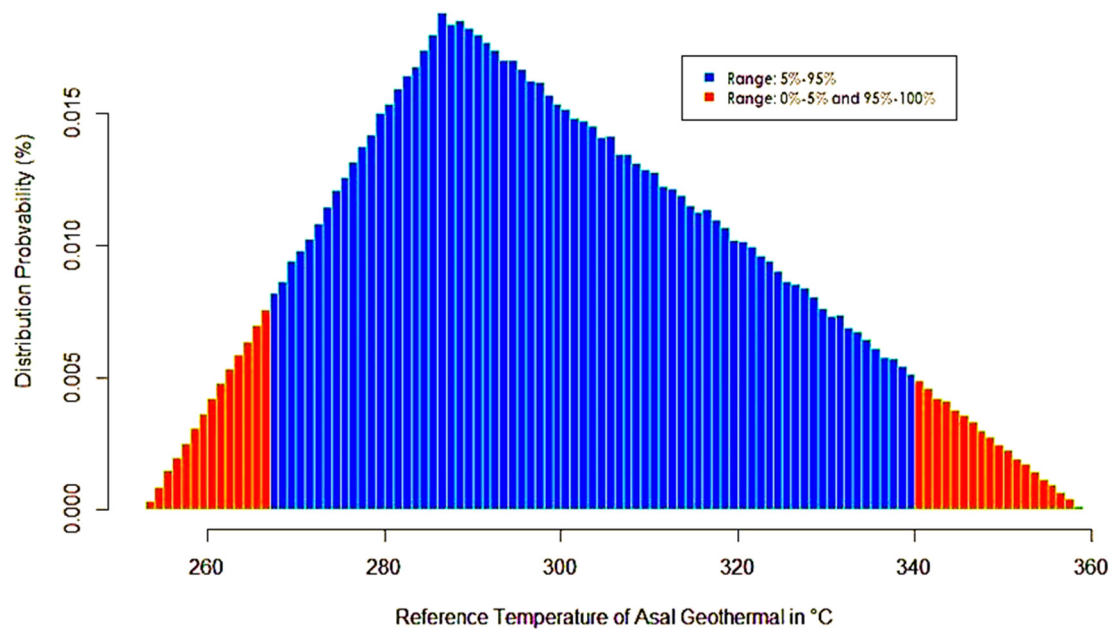

**Figure S8.** Probability distribution of Monte Carlo simulation of Reference Temperature of Asal-Ghoubbet Rift in °C.

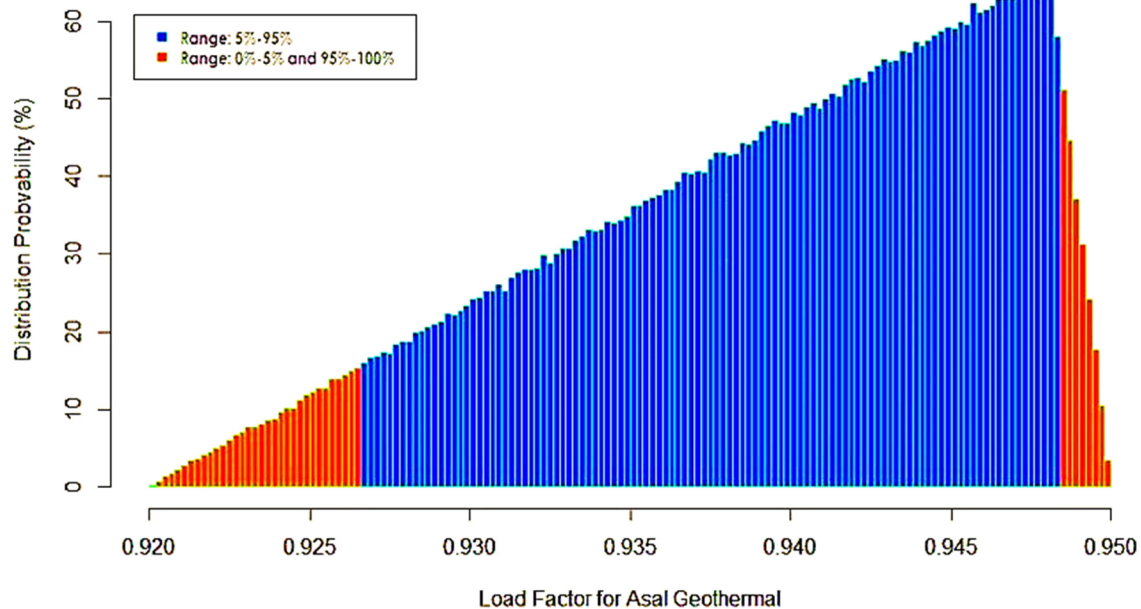

**Figure S9.** Probability distribution of Monte Carlo simulation of Load Factor of Asal-Ghoubbet Rift.

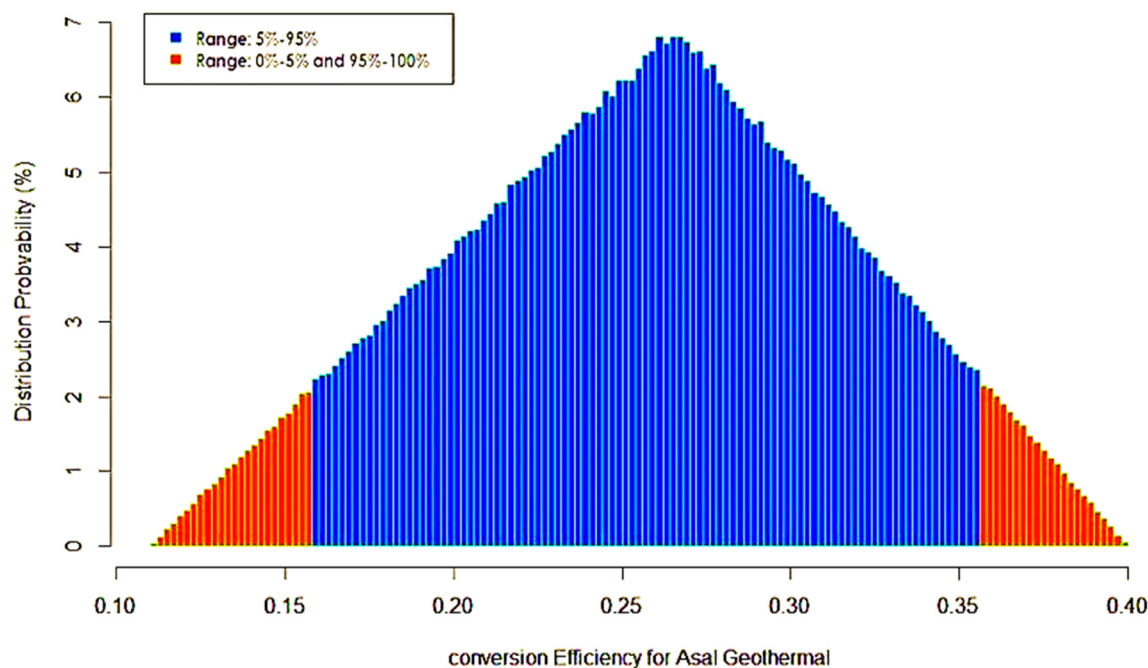

**Figure S10.** Probability distribution of Monte Carlo simulation of Conversion efficiency of Asal-Ghoubbet Rift.

**Table S8.** Most probable values and distributions for the parameters of USGS volumetric method for Asal-Ghoubbet Rift.

| Entry Parameter of USGS                | Unit              | Average | Min              | Max      | Probability Distribution | Reference         |
|----------------------------------------|-------------------|---------|------------------|----------|--------------------------|-------------------|
| Area of reservoir                      | km <sup>2</sup>   | 3.25    | 2.5              | 4        | Triangular               | [31-33]           |
| Thickness of reservoir                 | m                 | 1175    | 850              | 1500     | Triangular               |                   |
| Fluid Density                          | kg/m <sup>3</sup> | 973     | 820              | 1126     | Constant                 | [34, 35, 37, 38]  |
| Fluid specific Heat Capacity           | J/kg°C            | 4500    | 4200             | 4800     | Constant                 | [42]              |
| Rock Density                           | kg/m <sup>3</sup> | 2500    | 2000             | 3000     | Constant                 | [36, 39-41]       |
| Rock Specific Heat Capacity            | J/kg°C            | 875     | 850              | 900      | Triangular               | [32, 37, 48]      |
| Reference Temperature                  | °C                | 306     | 253              | 359      | Triangular               | [43,33]           |
| Final Temperature                      | °C                | 110     | 40               | 180      | Constant                 | [44,45]           |
| Porosity                               | %                 | 5.05    | 0.1              | 10       | Lognormal                | [31,41]           |
| Recovery Factor                        | %                 | 12.5    | 5                | 20       | Uniform                  | [41,46]           |
| Conversion Efficiency                  | %                 | 25.5    | 11               | 40       | Constant/ Triangular     | [46,47]           |
| Load Factor                            | %                 | 93.5    | 92               | 95       | Triangular               | [46, 47, 10]      |
| Life time                              | yr                | 25      | /                | /        | Constant                 | [48]              |
| Asal-Ghoubbet Rift Rock energy storage |                   |         | 1.546674.10e18 J | [90.38%] |                          | 67.18 MWe         |
| Asal-Ghoubet Rift Fluid energy storage |                   |         | 1.646541.10e17 J | [9.62%]  |                          | 7.15 MWe          |
| Electrical reservoir capacity          |                   |         |                  |          |                          | <b>74.327 MWe</b> |

**Table S9.** Result of thermoeconomics analysis of dry steam Asal power plant

| Year (t)     | ICt (\$/kW)           | O&Mt (\$)            | Et (kWh)                | PVC (\$)              |
|--------------|-----------------------|----------------------|-------------------------|-----------------------|
| 0            | 3,157.49 <sup>1</sup> | 0                    | 0                       | 83 125 515.89         |
| 1            | 0                     | 3 734 120.28         | 155 721 457.14          | 3 734 120.28          |
| 2            | 0                     | 3 319 218.02         | 138 419 073.01          | 3 319 218.02          |
| 3            | 0                     | 2 950 416.02         | 123 039 176.01          | 2 950 416.02          |
| 4            | 0                     | 2 622 592.02         | 109 368 156.45          | 2 622 592.02          |
| 5            | 0                     | 2 331 192.91         | 97 216 139.07           | 2 331 192.91          |
| 6            | 0                     | 2 072 171.47         | 86 414 345.84           | 2 072 171.47          |
| 7            | 0                     | 1 841 930.20         | 76 812 751.86           | 1 841 930.19          |
| 8            | 0                     | 1 637 271.29         | 68 278 001.65           | 1 637 271.29          |
| 9            | 0                     | 1 455 352.25         | 60 691 557.02           | 1 455 352.25          |
| 10           | 0                     | 1 293 646.45         | 53 948 050.69           | 1 293 646.45          |
| 11           | 0                     | 1 149 907.95         | 47 953 822.83           | 1 149 907.95          |
| 12           | 0                     | 1 022 140.40         | 42 625 620.30           | 1 022 140.40          |
| 13           | 0                     | 908 569.25           | 37 889 440.26           | 908 569.25            |
| 14           | 0                     | 807 617.11           | 33 679 502.46           | 807 617.11            |
| 15           | 0                     | 717 881.87           | 29 937 335.52           | 717 881.87            |
| 16           | 0                     | 638 117.22           | 26 610 964.90           | 638 117.22            |
| 17           | 0                     | 567 215.31           | 23 654 191.03           | 567 215.31            |
| 18           | 0                     | 504 191.39           | 21 025 947.58           | 504 191.39            |
| 19           | 0                     | 448 170.12           | 18 689 731.18           | 448 170.12            |
| 20           | 0                     | 398 373.44           | 16 613 094.38           | 398 373.44            |
| 21           | 0                     | 354 109.72           | 14 767 195.01           | 354 109.72            |
| 22           | 0                     | 314 764.20           | 13 126 395.56           | 314 764.2             |
| 23           | 0                     | 279 790.40           | 11 667 907.17           | 279 790.39            |
| 24           | 0                     | 248 702.58           | 10 371 473.04           | 248 702.58            |
| 25           | 0                     | 221 068.96           | 9 219 087.14            | 221 068.96            |
| <b>Total</b> | <b>3,157.49</b>       | <b>31 838 530.82</b> | <b>1 327 740 417.10</b> | <b>114 964 046.71</b> |
| <b>LCOE</b>  |                       |                      | <b>\$cents/KWh</b>      | <b>8.66</b>           |

1. In this subtotal, US\$12,964,527 is the drilling cost of one well over a depth of 2500 m at AG rift

**Table S10.** Result of thermoeconomics analysis of single flash Asal power plant.

| Year (t) | ICt (\$/kW)           | O&Mt (\$)  | Et (kWh)      | PVC (\$)      |
|----------|-----------------------|------------|---------------|---------------|
| 0        | 3,294.20 <sup>1</sup> | 0.00       | 0.00          | 29 145 684.07 |
| 1        | 0.00                  | 893 677.32 | 34 423 415.73 | 893 677.32    |
| 2        | 0.00                  | 794 379.84 | 30 598 591.76 | 794 379.84    |
| 3        | 0.00                  | 706 115.41 | 27 198 748.23 | 706 115.41    |
| 4        | 0.00                  | 627 658.15 | 24 176 665.09 | 627 658.15    |
| 5        | 0.00                  | 557 918.35 | 21 490 368.97 | 557 918.35    |

|              |          |                     |                       |                      |
|--------------|----------|---------------------|-----------------------|----------------------|
| 6            | 0.00     | 495 927.42          | 19 102 550.20         | 495 927.42           |
| 7            | 0.00     | 440 824.38          | 16 980 044.62         | 440 824.38           |
| 8            | 0.00     | 391 843.89          | 15 093 373.00         | 391 843.89           |
| 9            | 0.00     | 348 305.68          | 13 416 331.55         | 348 305.68           |
| 10           | 0.00     | 309 605.05          | 11 925 628.05         | 309 605.05           |
| 11           | 0.00     | 275 204.49          | 10 600 558.26         | 275 204.49           |
| 12           | 0.00     | 244 626.21          | 9 422 718.46          | 244 626.21           |
| 13           | 0.00     | 217 445.52          | 8 375 749.74          | 217 445.52           |
| 14           | 0.00     | 193 284.91          | 7 445 110.88          | 193 284.91           |
| 15           | 0.00     | 171 808.81          | 6 617 876.34          | 171 808.81           |
| 16           | 0.00     | 152 718.94          | 5 882 556.74          | 152 718.94           |
| 17           | 0.00     | 135 750.17          | 5 228 939.33          | 135 750.17           |
| 18           | 0.00     | 120 666.82          | 4 647 946.07          | 120 666.82           |
| 19           | 0.00     | 107 259.39          | 4 131 507.62          | 107 259.39           |
| 20           | 0.00     | 95 341.68           | 3 672 451.22          | 95 341.68            |
| 21           | 0.00     | 84 748.16           | 3 264 401.08          | 84 748.16            |
| 22           | 0.00     | 75 331.70           | 2 901 689.85          | 75 331.70            |
| 23           | 0.00     | 66 961.51           | 2 579 279.87          | 66 961.51            |
| 24           | 0.00     | 59 521.34           | 2 292 693.21          | 59 521.34            |
| 25           | 0.00     | 52 907.86           | 2 037 949.52          | 52 907.86            |
| <b>Total</b> | 3,294.20 | <b>7 619 833.01</b> | <b>293 507 145.36</b> | <b>36 765 517.08</b> |
| <b>LCOE</b>  |          |                     | <b>\$cents/KWh</b>    | <b>12.53</b>         |

1. In this subtotal, US\$12,964,527 is the drilling cost of one well over a depth of 2500 m at AG rift

**Table S11.** Result of Monte Carlo simulation for potential capacity of Asal Well.

| Statistics Parameters | Units | Values  |
|-----------------------|-------|---------|
| Minimum               | MWe   | 6.037   |
| Probability of 5%     | MWe   | 23.462  |
| Probability of 10%    | MWe   | 28.385  |
| Probability of 15%    | MWe   | 32.398  |
| Probability of 20%    | MWe   | 36.060  |
| Probability of 25%    | MWe   | 39.601  |
| Probability of 30%    | MWe   | 43.117  |
| Probability of 32.5%  | MWe   | 44.806  |
| Probability of 35%    | MWe   | 46.657  |
| Probability of 40%    | MWe   | 50.229  |
| Probability of 45%    | MWe   | 53.917  |
| Probability of 50%    | MWe   | 57.729  |
| Probability of 55%    | MWe   | 61.684  |
| Probability of 60%    | MWe   | 65.869  |
| Probability of 65%    | MWe   | 70.368  |
| Probability of 70%    | MWe   | 75.247  |
| Probability of 75%    | MWe   | 80.655  |
| Probability of 80%    | MWe   | 86.849  |
| Probability of 85%    | MWe   | 94.226  |
| Probability of 90%    | MWe   | 103.868 |

|                     |                     |           |
|---------------------|---------------------|-----------|
| Probability of 95%  | MWe                 | 118.800   |
| Average             | MWe                 | 62.654    |
| Variance            | MWe <sup>2</sup>    | 892.33    |
| Standard Deviation  | MWe                 | 29.872    |
| Skewness            | --                  | 0.847     |
| Kurtosis            | --                  | 0.653     |
| Maximum             | MWe                 | 241.531   |
| Power density       | MWe/km <sup>2</sup> | 8.73      |
| Number of iteration | Times               | 1,000,000 |

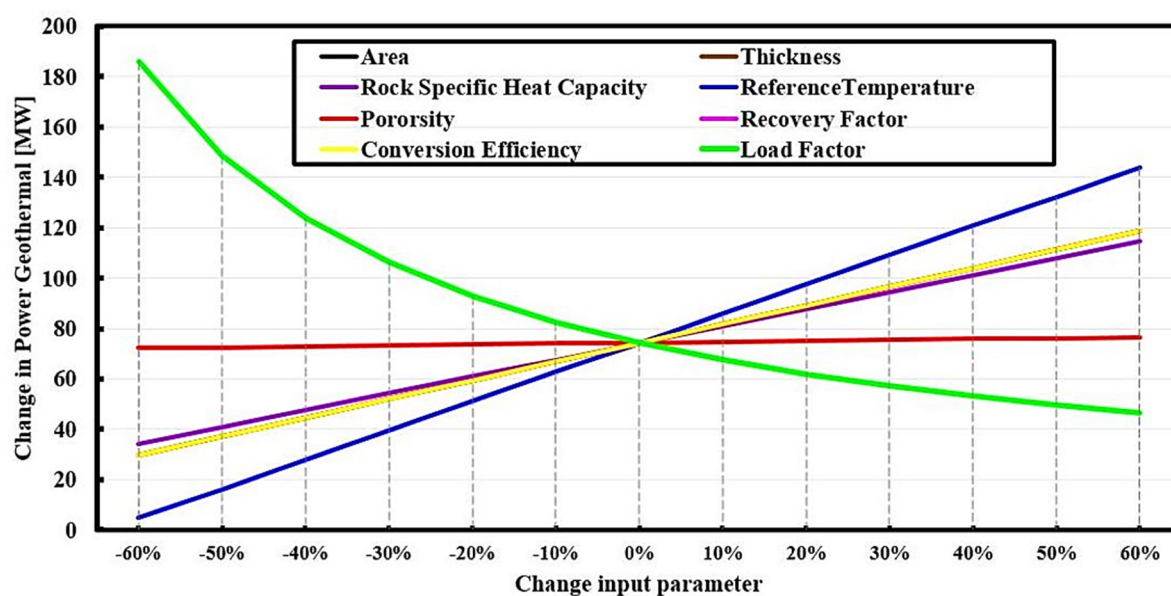

Figure S11. Sensitivity diagram for volumetric parameters variation.

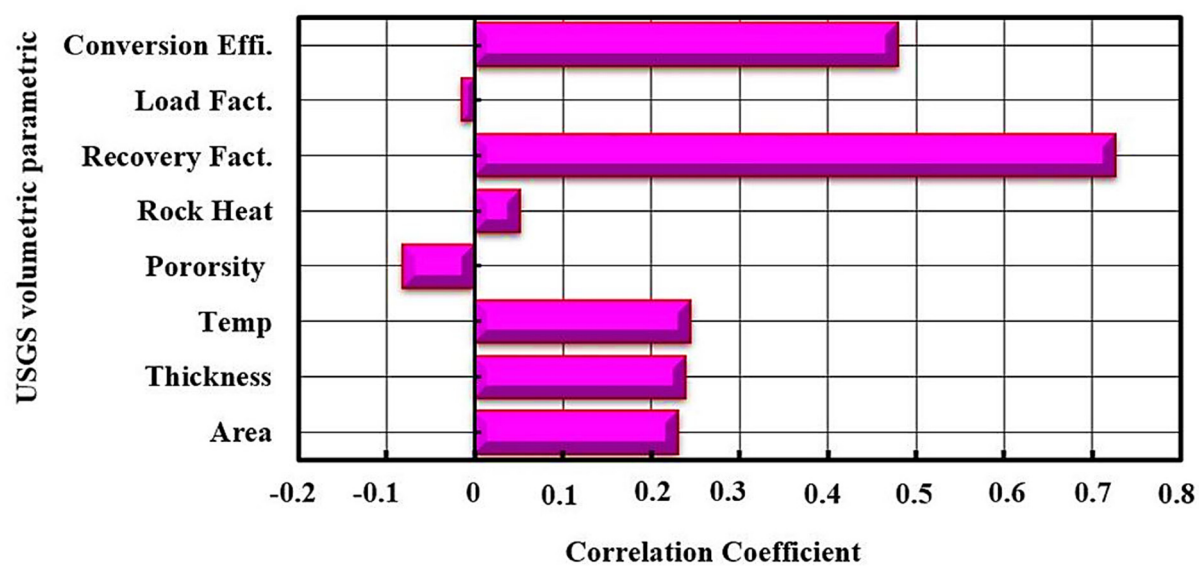

Figure S12. Chart Correlation in Monte Carlo simulation.

**Table S12.** Result of economic analyses of green hydrogen production supply with the geothermal energy.

| Thermodynamic Operation | Electrolyser coupled with geothermal power plant | Total Capital cost (US\$) | Electrical cost (US\$/year) | Operating and maintenance cost (US\$/Year) |
|-------------------------|--------------------------------------------------|---------------------------|-----------------------------|--------------------------------------------|
| Reversible case         | Single flash-PEMEm                               | 6527458.79                | 4850968.83                  | 1033367.94                                 |
|                         | Dry steam-PEMEm                                  | 21273902.66               | 15168 751.91                | 3303587.00                                 |
|                         | Single flash-HTE                                 | 6919963.95                | 15168 751.91                | 1250337.38                                 |
|                         | Dry steam-HTE                                    | 22732202.50               | 4850968.83                  | 3997 19.33                                 |
| Irreversible case       | Single flash-PEMEm                               | 5965510.22                | 4850968.83                  | 712735.56                                  |
|                         | Dry steam-PEMEm                                  | 19197649.02               | 15168751.91                 | 2278553.27                                 |
|                         | Single flash-HTE                                 | 6813861.48                | 4850968.83                  | 1192163.07                                 |
|                         | Dry steam-HTE                                    | 22337439.99               | 15168751.91                 | 3811241.12                                 |



The efficiency of the Wind-Electrolyzer system with and without considering degradation rate of wind turbine over the year.

**Table S13.** Energy efficiency of the wind-powered hydrogen production system in Ghoubbet without and with degradation rate

| yr | Yearly hydrogen production<br>considering different degradation<br>rates (ton/yr) |         |             |         | Input energy<br>(GJ) | Energy efficiency of the examined hydrogen<br>generation system (%) |        |             |        |
|----|-----------------------------------------------------------------------------------|---------|-------------|---------|----------------------|---------------------------------------------------------------------|--------|-------------|--------|
|    | Without                                                                           |         | With        |         |                      | Without                                                             |        | With        |        |
|    | Degradation                                                                       |         | Degradation |         |                      | Degradation                                                         |        | Degradation |        |
|    | AWE                                                                               | PEME    | AWE         | PEME    |                      | AWE                                                                 | PEME   | AWE         | PEME   |
| 1  | 398.714                                                                           | 310.111 | 398.714     | 310.111 | 285911.89            | 19.802                                                              | 15.402 | 19.802      | 15.402 |
| 2  | 398.714                                                                           | 310.111 | 392.334     | 305.149 |                      | 19.802                                                              | 15.402 | 19.486      | 15.155 |
| 3  | 398.714                                                                           | 310.111 | 386.057     | 300.267 |                      | 19.802                                                              | 15.402 | 19.174      | 14.913 |
| 4  | 398.714                                                                           | 310.111 | 379.880     | 295.462 |                      | 19.802                                                              | 15.402 | 18.867      | 14.674 |
| 5  | 398.714                                                                           | 310.111 | 373.802     | 290.735 |                      | 19.802                                                              | 15.402 | 18.565      | 14.440 |
| 6  | 398.714                                                                           | 310.111 | 367.821     | 286.083 |                      | 19.802                                                              | 15.402 | 18.268      | 14.209 |
| 7  | 398.714                                                                           | 310.111 | 361.936     | 281.506 |                      | 19.802                                                              | 15.402 | 17.976      | 13.981 |
| 8  | 398.714                                                                           | 310.111 | 356.145     | 277.002 |                      | 19.802                                                              | 15.402 | 17.688      | 13.757 |
| 9  | 398.714                                                                           | 310.111 | 350.447     | 272.570 |                      | 19.802                                                              | 15.402 | 17.405      | 13.537 |
| 10 | 398.714                                                                           | 310.111 | 344.840     | 268.209 |                      | 19.802                                                              | 15.402 | 17.127      | 13.321 |
| 11 | 398.714                                                                           | 310.111 | 339.322     | 263.917 |                      | 19.802                                                              | 15.402 | 16.853      | 13.108 |
| 12 | 398.714                                                                           | 310.111 | 333.893     | 259.695 |                      | 19.802                                                              | 15.402 | 16.583      | 12.898 |
| 13 | 398.714                                                                           | 310.111 | 328.551     | 255.539 |                      | 19.802                                                              | 15.402 | 16.318      | 12.692 |
| 14 | 398.714                                                                           | 310.111 | 323.294     | 251.451 |                      | 19.802                                                              | 15.402 | 16.057      | 12.488 |
| 15 | 398.714                                                                           | 310.111 | 318.121     | 247.428 |                      | 19.802                                                              | 15.402 | 15.800      | 12.289 |
| 16 | 398.714                                                                           | 310.111 | 313.031     | 243.469 |                      | 19.802                                                              | 15.402 | 15.547      | 12.092 |
| 17 | 398.714                                                                           | 310.111 | 308.023     | 239.573 |                      | 19.802                                                              | 15.402 | 15.298      | 11.899 |
| 18 | 398.714                                                                           | 310.111 | 303.094     | 235.740 |                      | 19.802                                                              | 15.402 | 15.053      | 11.708 |
| 19 | 398.714                                                                           | 310.111 | 298.245     | 231.968 |                      | 19.802                                                              | 15.402 | 14.813      | 11.521 |
| 20 | 398.714                                                                           | 310.111 | 293.473     | 228.257 |                      | 19.802                                                              | 15.402 | 14.576      | 11.337 |

**Table S14.** CO<sub>2</sub> and fuel oil avoided with Wind energy development

|    | Wind CO <sub>2</sub> Savings<br>in tonCO <sub>2</sub> /yr | Wind Barrels Avoided (BA) in<br>bbl | Wind CO <sub>2</sub> Savings<br>in tonCO <sub>2</sub> /yr | Wind Barrels Avoided (BA) in<br>bbl |
|----|-----------------------------------------------------------|-------------------------------------|-----------------------------------------------------------|-------------------------------------|
|    | Without Degradation                                       |                                     | With Degradation                                          |                                     |
| 1  | 5154.040                                                  | 11350.051                           | 5154.040                                                  | 11350.051                           |
| 2  | 5154.040                                                  | 11350.051                           | 5071.575                                                  | 11168.450                           |
| 3  | 5154.040                                                  | 11350.051                           | 4990.430                                                  | 10989.755                           |
| 4  | 5154.040                                                  | 11350.051                           | 4910.583                                                  | 10813.919                           |
| 5  | 5154.040                                                  | 11350.051                           | 4832.014                                                  | 10640.896                           |
| 6  | 5154.040                                                  | 11350.051                           | 4754.701                                                  | 10470.642                           |
| 7  | 5154.040                                                  | 11350.051                           | 4678.626                                                  | 10303.112                           |
| 8  | 5154.040                                                  | 11350.051                           | 4603.768                                                  | 10138.262                           |
| 9  | 5154.040                                                  | 11350.051                           | 4530.108                                                  | 9976.050                            |
| 10 | 5154.040                                                  | 11350.051                           | 4457.626                                                  | 9816.433                            |
| 11 | 5154.040                                                  | 11350.051                           | 4386.304                                                  | 9659.370                            |
| 12 | 5154.040                                                  | 11350.051                           | 4316.123                                                  | 9504.820                            |
| 13 | 5154.040                                                  | 11350.051                           | 4247.065                                                  | 9352.743                            |
| 14 | 5154.040                                                  | 11350.051                           | 4179.112                                                  | 9203.099                            |
| 15 | 5154.040                                                  | 11350.051                           | 4112.246                                                  | 9055.850                            |
| 16 | 5154.040                                                  | 11350.051                           | 4046.451                                                  | 8910.956                            |
| 17 | 5154.040                                                  | 11350.051                           | 3981.707                                                  | 8768.381                            |
| 18 | 5154.040                                                  | 11350.051                           | 3918.000                                                  | 8628.087                            |
| 19 | 5154.040                                                  | 11350.051                           | 3855.312                                                  | 8490.037                            |
| 20 | 5154.040                                                  | 11350.051                           | 3793.627                                                  | 8354.197                            |

**Table S15.** Exergoenvironment of dry steam and single flash power plant

| Exergoenvironment parameter     | Unit | Dry steam | Single flash |
|---------------------------------|------|-----------|--------------|
| Total exergy destruction        | KW   | 18832,08  | 10813,12     |
| Total input exergy              | KW   | 41052,61  | 15725,13     |
| impact factor                   | /    | 0.46      | 0.69         |
| Exergy efficiency               | %    | 0.54      | 0.31         |
| Impact index factor             | /    | 0.85      | 2.20         |
| Improvement Impact index factor | /    | 1.18      | 0.45         |

## References

1. Baseer, M. A.; Meyer, J. P.; Rehman, S.; Alam, M. M. Wind power characteristics of seven data collection sites in Jubail, Saudi Arabia using Weibull parameters. *Renewable Energy* **2017**, *102*, 35–49.
2. Aukitino, T.; Khan, M. M.; Ahmed, M. R. Wind energy resource assessment for Kiribati with a comparison of different methods of determining Weibull parameters. *Energy Conversion and Management* **2017**, *151*, 641–660.
3. Costa Rocha, P. A.; de Sousa, R. C.; de Andrade, C. F.; da Silva, M. V. Comparison of seven numerical methods for determining Weibull parameters for wind energy generation in the northeast region of Brazil. *Applied Energy* **2012**, *89*, 395–400.
4. Tizgui, I.; El Guezar, F.; Bouzahir, H.; Benaid, B. Comparison of methods in estimating Weibull parameters for wind energy applications. *International Journal of Energy Sector Management* **2017**, *11*, 650–663.
5. Wang, J.; Huang, X.; Li, Q.; Ma, X. Comparison of seven methods for determining the optimal statistical distribution parameters: A case study of wind energy assessment in the large-scale wind farms of China. *Energy* **2018**, *164*, 432–448.
6. Berretti, S.; Thampi, S. M.; Srivastava, P. R. Intelligent Systems Technologies and Applications. *Advances in Intelligent Systems and Computing* **2016**, *1*.
7. Li, G.; Shi, J. On comparing three artificial neural networks for wind speed forecasting. *Applied Energy* **2010**, *87*, 2313–2320.
8. Ciriaco, A. E.; Zarrouk, S. J.; Zakeri, G. Geothermal resource and reserve assessment methodology: Overview, analysis and future directions. *Renewable and Sustainable Energy Reviews* **2020**, *119*.
9. Muffler, P.; Cataldi, R. Methods for regional assessment of geothermal resources. *Geothermics* **1978**, *7*, 53–89.
10. Pocasangre, C.; Fujimitsu, Y. A. Python-based stochastic library for assessing geothermal power potential using the volumetric method in a liquid-dominated reservoir. *Geothermics* **2018**, *76*, 164–176.
11. Shah, M.; Vaidya, D.; Sircar, A. Using Monte Carlo simulation to estimate geothermal resource in Dholera geothermal field, Gujarat, India. *Multiscale and Multidisciplinary Modeling, Experiments and Design* **2018**, *1*, 83–95.
12. Shamoushaki, M.; Ehyaei, M. A.; Ghanatir, F. Exergy, economic and environmental analysis and multi-objective optimization of a SOFC-GT power plant. *Energy* **2017**, *134*, 515–531.
13. Karapekmez, A.; Dincer, I. Modelling of hydrogen production from hydrogen sulfide in geothermal power plants. *International Journal of Hydrogen Energy* **2018**, *43*, 10569–10579.
14. Darvish, K.; Ehyaei, M.; Atabi, F.; Rosen, M. Selection of Optimum Working Fluid for Organic Rankine Cycles by Exergy and Exergy-Economic Analyses. *Sustainability* **2015**, *7*, 15362–15383.
15. Fallah, M.; Ghiasi, R. A.; Mokarram, N. H. A. Comprehensive comparison among different types of geothermal plants from exergy and thermoeconomic points of view. *Thermal Science and Engineering Progress* **2018**, *5*, 15–24.
16. Staffell, I.; Green, R. How does wind farm performance decline with age? *Renewable Energy*, **2014** *66*, 775–786.

- 
17. Byrne, R.; Astolfi, D.; Castellani, F.; Hewitt, N. A. Study of Wind Turbine Performance Decline with Age through Operation Data Analysis. *Energies*, **2020**, *13*.
  18. Hackstein, F. V.; Madlener, R. Sustainable operation of geothermal power plants: why economics matters. *Geothermal Energy* **2021**, *9*, 10.
  19. Ortega-Izquierdo, M.; del Río, P. Benefits and costs of renewable electricity in Europe. *Renewable and Sustainable Energy Reviews*, **2016**, *61*, 372–383.
  20. Rezaei, M.; Khozani, N.; Jafari, N. Wind energy utilization for hydrogen production in an underdeveloped country: An economic investigation. *Renewable Energy* **2019**, *147*, 1044–1057.
  21. Shamoushaki, M.; Aliehyaei, M.; Taghizadeh-Hesary, F. Energy, Exergy, Exergoeconomic, and Exergoenvironmental Assessment of Flash-Binary Geothermal Combined Cooling, Heating and Power Cycle. *Energies* **2021**, *14*, 4464.
  22. Awaleh, M.O.; Boschetti, T.; Soubaneh, Y.D.; Baudron, P.; Kawalieh, A.D.; Dabar, O.A.; Ahmed, M.M.; Ahmed, S.I.; Daoud, M.A.; Egueh, N.M.; Mohamed, J. Geochemical study of the Sakalol-Harralol geothermal field (Republic of Djibouti): Evidences of a low enthalpy aquifer between Manda-Inakir and Asal rift settings. *Journal of Volcanology and Geothermal Research*, **2017**, *331*, 26–52.
  23. McPhy Driving Clean Energy Forward. (Accessed on 26 July 2021).
  24. Ursua, A.; Gandia, L. M.; and Sanchis, P. Hydrogen Production From Water Electrolysis: Current Status and Future Trends. *Proceedings of the IEEE*, **2012**, *100*, 410–426.
  25. Ayodele, T. R.; Munda, J. L. Potential and economic viability of green hydrogen production by water electrolysis using wind energy resources in South Africa. *International Journal of Hydrogen Energy* **2019**, *44*, 17669–16687.
  26. Greiner, C.; korpas, M.; Holen, A. A Norwegian case study on the production of hydrogen from wind power. *International Journal of Hydrogen Energy* **2007**, *32*, 1500–1507.
  27. Yilmaz, C.; Kanoglu, M.; Bolatturk, A.; Gadalla, M. Economics of hydrogen production and liquefaction by geothermal energy. *International Journal of Hydrogen Energy* **2012**, *37*, 2058–2069.
  28. Motazedi, K.; Salkuyeh, Y. K.; Laurenzi, I. J.; MacLean, H. L.; Bergerson, J. A. Economic and environmental competitiveness of high temperature electrolysis for hydrogen production. *International Journal of Hydrogen Energy* **2021**, *46*, 21274–21288.
  29. Lucas Bauer and Silvio Matysik. The big portal for wind energy. (Accessed on 25 July 2021).
  30. Guangzhou Kai Yuan Water Treatment Equipment Co.Ltd. (Accessed on 26 July 2021).
  31. Houssein, D. E.; Axelsson, G. Geothermal resources in the Asal Region, Republic of Djibouti: An update with emphasis on reservoir engineering studies. *Geothermics*, **2010** *39*, 220–227.
  32. Halldórsdóttir, S.; Björnsson, H. ; Mortensen, A. ; Axelsson, G.; Guðmundsson, Á. Temperature Model and Volumetric Assessment of the Krafla Geothermal Field in N-Iceland. *Proceedings World Geothermal Congress 2010, Bali, Indonesia*, **2010**.

33. Gaetan Sakindi. Three-dimensional inversion of magnetotelluric data: geological/geothermal interpretation of Asal geothermal field, Djibouti. Orkustofnun, Grensasvegur 9, IS-108 Reykjavik, Iceland. **2015**.
34. Battistel, A.; RIVERA J.; Ferragina. C. Reservoir Engineering Studies at the Asal Field: Republic of Djibouti. Geothermol Resources Council BUUETIN, **1991**.
35. D'Amore, F.; Giusti, D.; Abdallah, A. Geochemistry of the high-salinity geothermal field of Asal, Republic of Djibouti, Africa. *Geothermics*, **1998** 27, 197–210.
36. Keilegavlen, E.; Duboeuf, L.; Dichiarante, A. M.; Halldórsdóttir, S.; Stefansson, I.; Naumann, M.; Berre, I. Hydro-mechanical simulation and analysis of induced seismicity for a hydraulic stimulation test at the Reykjanes geothermal field, Iceland. *Geothermics* **2021**, 97, 102223.
37. Juncu, D.; Árnadóttir, T.; Geirsson, H.; Gunnarsson, G. The effect of fluid compressibility and elastic rock properties on deformation of geothermal reservoirs. *Geophysical Journal International*, **2019**, 217, 122–134.
38. Keiding, M.; Árnadóttir, T.; Jónsson, S.; Decriem, J.; Hooper, A. Plate boundary deformation and man-made subsidence around geothermal fields on the Reykjanes Peninsula, Iceland. *Journal of Volcanology and Geothermal Research* **2010**, 194, 139–149.
39. Jacoby, W. R.; Weigel, W.; Fedorova, T. Crustal structure of the Reykjanes Ridge near 62°N, on the basis of seismic fraction and gravity data. *Journal of Geodynamics*, **2007**, 43, 55–72.
40. Cornel O. An update of the natural state numerical model of Olkaria geothermal system, Kenya. Proceedings, Tough symposium 2003 Lawrence Berkeley National Laboratory, Berkeley, California, **2003**.
41. Hochstein, M. P. Comments on: The structure of the shallow crust beneath Olkaria geothermal field, Kenya, deduced from gravity studies, by J.M. Ndombi. *Journal*, **1984**.
42. Nadimi, S.; Forbes, B.; Moore, J.; Podgorney, R.; McLennan, J. D. Utah FORGE: Hydrogeothermal modeling of a granitic based discrete fracture network. *Geothermics*, **2020**, 87, 101853.
43. Fauzi, A. Geothermal resources and reserves in Indonesia: an updated revision. *Geoth. Energ. Sci.* **2015**, 3, 1–6.
44. Banks, J.; Harris, N. B. Geothermal potential of Foreland Basins: A case study from the Western Canadian Sedimentary Basin. *Geothermics*, **2018**, 76, 74–92.
45. Júlíusson, E.; Axelsson, G. Stock models for geothermal resources. *Geothermics*, **2018**, 72, 249–257.
46. Garg, S. K.; Combs, J. A reformulation of USGS volumetric “heat in place” resource estimation method. *Geothermics* **2015**, 55, 150–158.
47. Virkir-Orkint Consulting Group Ltd. Geothermal scaling and corrosion study, final report, Djibouti. Reykjanik, Iceland, August, **1990**.
48. Gaucher, E.T.; Kohl, F.; Limberger, A.; Dimier, J. Wang. Wellbore Simulator Application to RN-15/IDDP-2 well (Reykjanes, Iceland). *DEEPEGS*. **2015**.
